# Supplementary material for: Bright conjugated polymer nanoparticles containing a biodegradable shell produced at high yields and with tuneable optical properties by a scalable microfluidic device
Source: Royal Society of Chemistry journal article supplement (doi:10.1039/c6nr09162h), 2017-01-01
Supplement: c6nr09162h1.pdf [file c6nr09162h1.pdf]

# Electronic Supplementary Information Abelha et al

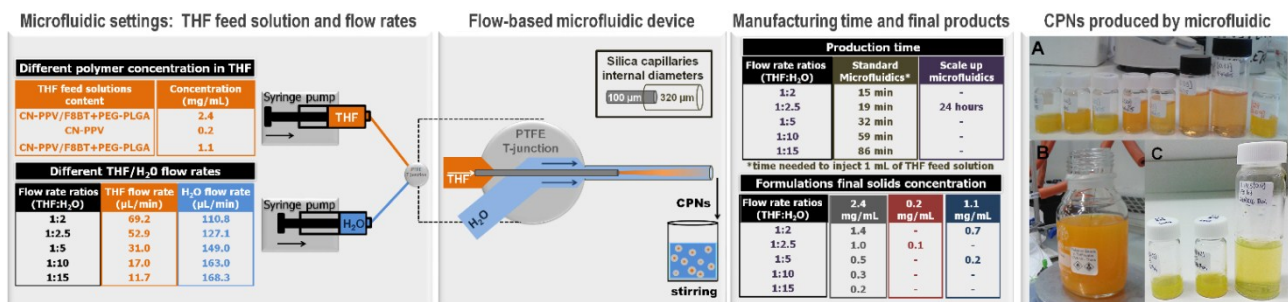

**Figure S1:** Representation of microfluidic device and production conditions of CN-PPV/F8BT formulations. **(A)** Pictures of CN-PPV nanoparticles prepared using 2.4, 0.2 and 1.1 mg/mL feed solution and different THF:H<sub>2</sub>O flow rate ratios: 1:2[1.4]; 1:2.5[1.0]; 1:2[0.7]; 1:5[0.5]; 1:5[0.2]; 1:10[0.3]; 1:15[0.2] and 1:2.5[0.1] (CN-PPV alone), from left to right. **(B)** Image of a CN-PPV scale up batch produced continuously over 24 h with a flow rate ratio of 1:2.5 and 2.4 mg/mL feed solution. **(C)** Images of the F8BT CPNs: 1:2[0.7]; 1:2[1.4] and 1:15[0.2], from left to right.

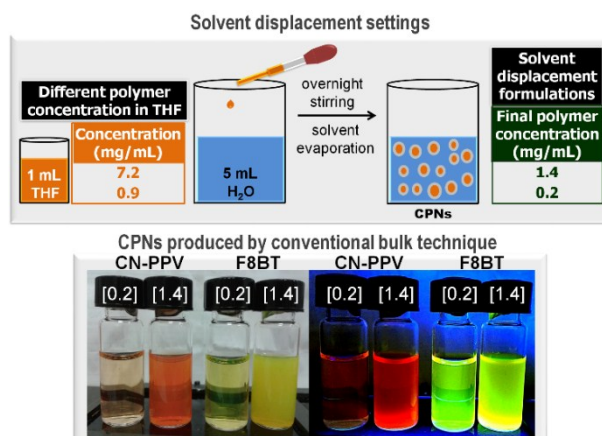

**Figure S2:** Preparation of CN-PPV/F8BT nanoparticles encapsulated within PEG<sub>5K</sub>-PLGA<sub>55K</sub> by solvent displacement technique. Pictures show solvent displacement CPNs under ambient light and under 365 nm UV illumination.
